# Supplementary material for: CRISPR/Cas9-Induced Knockout of Sting Increases Susceptibility of Zebrafish to Bacterial Infection
Source: MDPI journal article supplement (doi:10.3390/biom13020324), 2023-02-08
Supplement: s1 [file s1]

Supplementary File

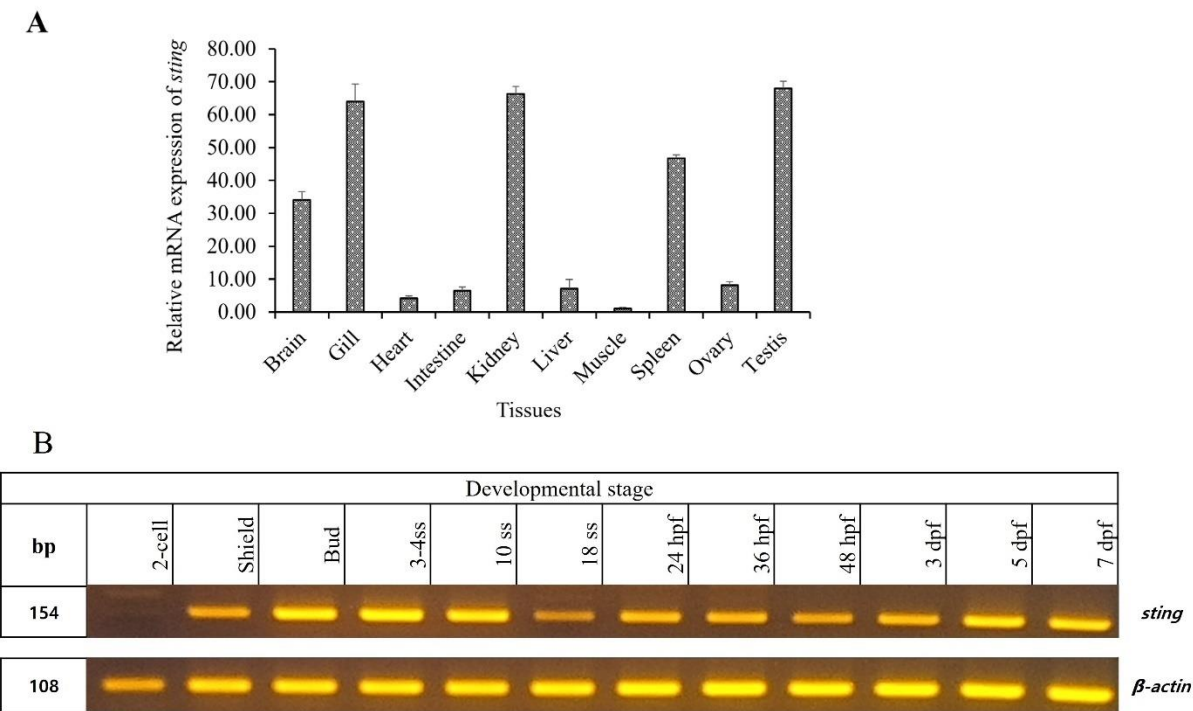

Supplementary Fig. 1. (A) The relative transcription of *sting* in different tissues of healthy adult zebrafish. The data is normalized to the lowest transcription tissue, muscle. The  $\beta$ -actin was used as an internal reference gene and the data is shown as the mean of standard deviation (n=3). (B) Transcription of *sting* through the embryonic developmental stages. PCR was performed using the cDNA samples from different developmental stages with *sting* and  $\beta$ -actin primers (Table. 1). The PCR product was analyzed by the agarose gel electrophoresis.

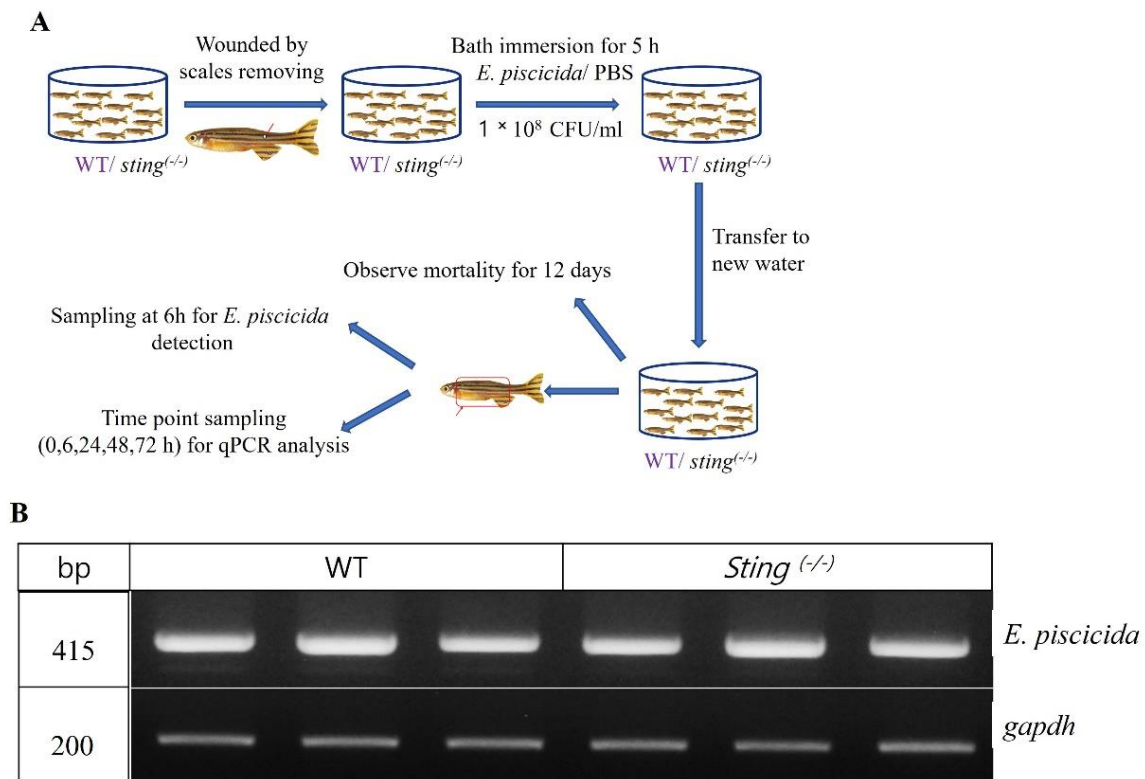

**Supplementary Fig. 2.** (A) The experimental flowchart of *E. piscicida* infection. The WT and *sting*<sup>(-/-)</sup> juvenile zebrafish were divided into three groups as mentioned in section 2.5. The *E. piscicida* infection groups and the PBS control groups were wounded by removing 10 scales. The *E. piscicida* at the final concentration of  $10^8$  CFU/mL was introduced to the *E. piscicida* infection groups and the same volume of PBS was added to the PBS control groups, the fish were transferred to a new tank after 5 hours of infection. Thereafter, the mortality experiment was performed by observing the mortality for 12 days post-infection and the challenge experiment was continued by collecting samples at each time point. (B) PCR confirmation of *E. piscicida* infection at 6hpi. The genomic DNA was extracted from the randomly selected zebrafish samples from WT and *sting*<sup>(-/-)</sup> and the *E. piscicida* was confirmed by PCR using *E. piscicida* detection primers and *gapdh* primers following agarose gel electrophoresis.
